# Supplementary material for: The lungs were on fire: a pilot study of 18F-FDG PET/CT in idiopathic-inflammatory-myopathy-related interstitial lung disease
Source: Research Square preprint supplement (doi:10.21203/rs.3.rs-457820/v1), 2021-04-28
Supplement: Supplementary file 1 [file 4d17eedb9626a019ecc7082f.xlsx]

## Sheet: RP-ILD�о������ϴ�
Codings	Age	Sex(1 for male and 0 for female)	Course of disease(m)	Duration of diagnosis delay(m)	MYOACTscore	Fever	Hepatomegaly	Splenomegaly	UIP pattern	Pneumomediastinum	Pulmonary hypertension	Gastrointestinal hemorrhage	Pulmonary bacterial infection	Types of pulmonary bacterial infection	Pulmonary fungal infection	Types of pulmonary fungal infection	Tuberculosis infection	EBV infection	CMV infection	Ferritin(ng/ml)	ESR(mm/h)	CRP(mg/L)	ALT(U/L)	AST(U/L)	LDH(U/L)	CK(U/L)	DM	PM	ADM	Steroid monotherapy	Steroid+DMARDs	Steroid+IVIG	Steroid+DMARDs+IVIG	Steroid+JAK inhibitor	Carcinoma	Types of Carcinoma	MDA5	PL7	PL12	EJ	OJ	Jo1	TIF1γ	Mi2α	Mi2β	SAE1	NXP2	SRP	Ku
1	1	52	0.7	0.7	17	1	0	0	0	0	0	0	1	Pseudomonas aeruginosa	1	Aspergillus	0	0	0	5105.7	12	22	304	501	771	1416	1	0	0	0	0	1	0	0	0		1	0	0	0	0	0	0	0	0	0	0	0	0
2	1	47	3	3	8	1	0	0	1	0	1	0	1	Acinetobacter baumannii	0		0	0	0	379.8	6	100.93	14	34	637	31	0	1	0	1	0	0	0	0	0		0	1	0	0	0	0	0	0	0	0	0	0	0
3	0	45	0.5	0.5	17	1	0	1	0	0	0	0	1	Kelbsiella pneumoniae	0		0	0	0	347.6	36	4.9	174	201	134	49	1	0	0	0	0	1	0	0	0		1	0	0	0	0	0	0	0	0	0	0	0	0
4	1	69	1	0.5	14	0	0	0	1	0	0	0	0		0		0	1	1	3792.5	2	1.1	14	17	264	60	1	0	0	0	1	0	0	0	0		0	0	0	0	0	1	0	0	0	0	0	0	0
5	1	51	2.2	2	18	0	0	0	0	0	0	0	1	Kelbsiella pneumoniae	0		0	0	0	3094.2	16	7.5	109	477	545	547	1	0	0	0	0	0	1	0	0		1	0	0	0	0	0	0	0	0	0	0	0	0
6	0	66	1	0.33	13	1	0	0	0	0	1	0	1	Kelbsiella pneumoniae	1	Candida albicans	0	1	0	582.4	10	4.7	43	37	663	63	0	0	1	0	1	0	0	0	0		1	0	0	0	0	0	0	0	0	0	0	0	0
7	0	63	0.5	0.5	14	1	0	1	0	0	0	1	0		0		0	0	0	612.5	20	1.2	31	53	347	157	1	0	0	1	0	0	0	0	0		1	0	0	0	0	0	0	0	0	0	0	0	0
8	1	42	2	2	15	1	0	1	0	0	0	0	0		1	Candida albicans	0	0	0	802.2	8	8.43	68	102	359	353	1	0	0	0	1	0	0	0	0		1	0	0	0	0	0	0	0	0	0	0	0	0
9	0	53	1	1	12	0	0	0	0	0	0	0	0		0		0	1	0	558.2	3	5.5	72	57	517	457	1	0	0	0	0	0	1	0	0		0	0	1	0	0	0	0	0	0	0	0	0	1
10	1	46	1.2	0.2	13	1	0	0	0	0	0	0	0		0		0	0	0	2523.7	27	33	90	22	287	52	0	0	1	0	0	0	0	1	0		1	0	0	0	0	0	0	0	0	0	0	0	0
11	0	61	2	2	16	1	0	0	0	0	1	1	0		0		0	0	0	1696.8	9	3	20	32	338	77	0	0	1	0	0	0	0	1	0		1	0	0	0	0	0	0	0	0	0	0	0	0
12	0	47	1.5	1.5	16	0	0	1	0	0	0	0	0		0		0	1	0	112.7	70	3.3	27	42	300	124	1	0	0	0	0	0	0	1	0		1	0	0	0	0	0	0	0	0	0	0	0	0
13	0	27	2	2	12	1	0	0	0	0	0	0	0		1	Aspergillus	0	0	0	61.3	25	3.2	33	40	308	112	1	0	0	1	0	0	0	0	0		0	1	0	0	0	0	0	0	0	0	0	0	0
14	1	66	7	5	4	0	0	0	1	1	0	0	0		0		0	0	0	111.4	93	35.1	14	17	148	125	1	0	0	1	0	0	0	0	1	Lung cancer	0	0	0	0	0	0	0	0	0	0	1	0	0
15	0	51	3	2	6	0	0	0	0	0	0	0	0		0		0	1	0	646.9	64	5.5	37	45	300	29	1	0	0	0	1	0	0	0	0		1	1	0	0	0	0	0	0	0	0	0	0	0
16	0	64	5	3	12	1	0	1	0	0	0	1	1	Stenotrophomonas maltophilia and Pseudomonas aeruginosa	0		0	0	0	2662.3	44	4.2	109	92	383	84	0	1	0	1	0	0	0	0	0		0	0	0	0	0	0	0	0	0	0	0	1	0
17	0	54	1	0.5	11	1	0	0	0	0	0	1	1	Staphylococcus aureus	0		0	0	0	273.5	6	34.5	31	46	311	106	0	0	1	0	0	0	1	0	0		1	1	0	0	0	0	0	0	0	0	0	0	0
18	0	62	3	0.5	14	0	0	0	0	0	0	0	0		0		0	1	1	1096.8	16	1.8	85	88	249	32	0	0	1	0	1	0	0	0	0		1	0	0	0	0	0	0	0	0	0	0	0	0
19	1	43	1	1	6	0	0	0	0	0	0	0	0		0		0	0	0	233.3	7	0.5	117	114	198	38	1	0	0	0	1	0	0	0	0		0	0	0	0	0	0	1	0	0	0	0	0	0
20	0	78	2.5	2.5	10	1	0	0	0	0	0	0	0		0		0	0	0	630.2	4	5.4	25	24	440	367	1	0	0	0	1	0	0	0	0		0	0	0	0	0	1	0	0	0	0	0	0	0
21	0	65	2	2	7	0	0	0	0	0	0	0	0		1	Candida albicans	0	0	0	330.6	28	17.6	16	34	329	73	0	0	1	1	0	0	0	0	0		1	0	0	0	0	0	0	0	0	0	0	0	0
22	0	44	0.3	0.3	17	1	0	0	0	0	0	0	1	Streptococcus pneumoniae	1	Candida albicans	0	0	0	923.8	33	13.9	399	408	1306	81	1	0	0	0	0	0	1	0	0		0	0	0	0	0	0	0	0	0	1	0	0	0
23	0	43	0.25	0.25	16	1	0	1	0	0	0	0	0		0		0	0	0	7283.9	6	0.1	951	1533	252	118	1	0	0	0	0	1	0	0	0		1	0	0	0	0	0	0	0	0	0	0	0	0
24	0	52	3	3	18	1	0	1	0	0	0	1	1	Stenotrophomonas maltophilia	0		0	0	0	5153.1	62	3	533	944	547	1047	1	0	0	0	1	0	0	0	0		1	0	0	0	0	0	0	0	0	0	0	0	0
25	0	57	10	2	9	0	0	0	0	0	0	0	0		0		0	1	0	925.9	9	3	118	151	283	32	1	0	0	0	1	0	0	0	0		1	0	0	0	0	0	0	0	0	0	0	0	0
26	0	58	0.8	0.8	8	0	0	0	0	0	0	0	0		0		0	0	0	492.8	3	3	24	43	329	429	1	0	0	0	0	0	0	1	0		0	0	0	0	0	0	0	0	0	0	1	0	0
27	1	56	1	1	12	0	0	0	0	0	0	0	0		0		0	0	0	1024	69	6.7	61	54	339	51	0	0	1	0	1	0	0	0	0		1	0	0	0	0	0	0	0	0	0	0	0	0
28	0	63	6	5	10	0	0	1	0	0	0	0	0		0		0	0	0	561.9	48	0.4	99	114	199	312	1	0	0	0	1	0	0	0	0		1	0	0	0	0	0	0	0	0	0	0	0	0
29	1	72	14	2	6	0	0	0	0	0	0	0	0		0		0	1	0	351.9	18	3.1	17	18	250	81	0	1	0	0	1	0	0	0	0		0	0	0	0	1	0	0	0	0	0	0	0	0
30	0	66	2	2	9	0	0	0	0	0	0	0	0		0		0	0	0	2271.3	12	4.9	33	41	356	608	1	0	0	0	0	0	1	0	0		0	0	0	0	0	0	0	0	0	1	0	0	0
31	1	56	0.5	0.5	7	0	1	0	0	0	0	0	0		0		0	0	0	663.1	25	4.8	169	254	917	5158	1	0	0	0	0	1	0	0	0		0	0	0	0	0	0	0	0	1	0	0	0	0
32	0	62	1	1	7	0	0	1	1	0	0	0	0	.00	0	.00	0	0	0	8993	13	17.39	648	849	491	77	1	0	0	1	0	0	0	0	0		0	0	0	0	0	1	0	0	0	0	0	0	0
33	0	48	4	1	14	0	0	0	0	0	0	0	0		0		0	0	0	1128.4	13	3.1	56	37	231	20	1	0	0	0	1	0	0	0	0		1	0	0	0	0	0	0	0	0	0	0	0	0
34	0	50	1	1	5	0	0	1	0	0	0	0	0		0		0	0	0	5225.4	95	100.2	84	50	247	16	1	0	0	1	0	0	0	0	0		0	0	0	0	0	0	0	0	0	0	1	0	0
35	0	83	1.5	1.5	17	1	0	0	0	0	0	0	0		0		0	0	0	269	11	9.4	11	17	160	26	1	0	0	1	0	0	0	0	1	Ovarian cancer	0	0	0	0	0	0	1	0	0	0	0	0	0
36	0	64	1	1	9	1	0	1	0	0	0	0	1	Unknown	0		0	0	0	3765.3	87	54	105	34	625	27	0	1	0	0	1	0	0	0	0		0	1	0	0	0	0	0	0	0	0	0	0	0
37	1	55	2.5	2	9	0	0	0	0	0	0	0	0		0		0	0	0	96.8	17	170.68	15	22	272	374	1	0	0	1	0	0	0	0	1	Rectal cancer	0	0	0	0	0	0	1	0	0	0	0	0	0
38	1	57	4	3.5	8	0	0	0	0	0	0	0	0		0		0	1	0	606.3	16	3.1	99	34	465	259	0	1	0	0	0	0	1	0	0		0	1	0	0	0	0	0	0	0	0	0	0	0
39	1	53	6	6	11	1	0	0	0	1	0	0	0		0		0	0	0	4725.4	32	7.19	49	51	129	58	1	0	0	1	0	0	0	0	0		1	0	0	0	0	0	0	0	0	0	0	0	0
40	0	64	1	1	6	1	0	0	0	0	1	0	0		1	Cryptococcus	0	0	0	4740.5	9	0.97	159	180	303	85	0	0	1	1	0	0	0	0	0		1	0	0	0	0	0	0	0	0	0	0	0	0
41	0	61	4	2	16	1	0	1	0	0	0	0	0		0		0	0	0	6766.3	64	7.4	269	896	451	45	0	0	1	0	1	0	0	0	0		1	0	0	0	0	0	0	0	0	0	0	0	0
42	1	61	1	1	4	0	0	0	0	0	0	0	0		0		0	0	0	121.9	33	3.1	36	31	314	212	1	0	0	0	1	0	0	0	0		1	0	0	0	0	0	0	0	0	0	0	0	0
43	1	64	6	6	5	1	0	0	0	0	0	0	0		1	Candida albicans	0	0	0	665	30	83.6	227	395	1315	4406	0	1	0	1	0	0	0	0	0		0	0	1	0	0	0	0	0	0	0	0	0	1
44	1	47	6	5	9	0	0	1	1	0	0	0	0		0		0	0	0	6355.6	22	2.2	500	623	344	179	0	0	1	0	1	0	0	0	0		0	0	0	0	0	0	0	1	1	0	0	0	0
45	0	70	1	1	7	0	0	0	0	0	0	0	0		0		0	0	0	247.4	23	8.47	235	172	1292	3509	0	1	0	1	0	0	0	0	1	Ovarian cancer	0	0	0	0	0	0	0	0	0	0	0	1	0
46	1	62	3	1	5	0	0	0	1	0	0	0	1	Stenotrophomonas maltophilia	1	Candida albicans	0	0	0	996.9	95	104.48	17	24	379	29	0	0	1	0	1	0	0	0	1	Lymphoma	0	0	0	0	0	0	0	0	0	0	1	0	0
47	0	70	4	4	8	0	0	0	0	0	0	0	0		0		0	0	0	261.8	19	11.8	24	21	317	87	1	0	0	1	0	0	0	0	0		0	0	0	0	0	0	1	0	0	0	0	0	0
48	0	34	4	3.5	11	0	0	0	0	0	0	0	0		0		0	0	0	217.8	2	0.3	10	13	223	44	1	0	0	0	1	0	0	0	0		0	0	0	0	0	0	0	1	1	0	0	0	0
49	1	55	0.67	0.67	11	1	1	1	0	0	0	0	0		0		0	0	0	508.5	98	73.6	86	51	283	292	1	0	0	0	1	0	0	0	0		0	0	0	0	0	1	0	0	0	0	0	0	0
50	1	60	6	2	7	0	0	1	0	0	0	0	0		0		0	0	0	215.9	13	5.6	50	39	211	89	0	1	0	1	0	0	0	0	0		0	0	0	0	0	0	0	0	0	0	0	1	0
51	1	71	5	4.5	8	0	0	1	0	0	1	0	0		0		0	0	0	511.4	12	40.3	47	55	396	829	0	1	0	0	1	0	0	0	0		0	0	0	0	0	0	0	0	1	0	0	0	0
52	0	32	1	1	4	1	0	1	0	0	0	0	0		0		0	0	0	60.1	11.9	26	139	141	227	23	0	0	1	1	0	0	0	0	0		0	0	0	0	0	0	0	0	0	1	0	0	0
53	0	55	1	0.75	9	0	0	0	0	0	0	0	0		0		0	0	0	345	5	0.7	62	87	508	2355	1	0	0	0	1	0	0	0	0		0	0	0	0	0	0	0	0	0	0	1	0	0
54	0	67	8	7	5	0	0	0	0	0	0	0	0		0		0	0	0	1264.4	21	0.6	27	42	170	53	1	0	0	0	1	0	0	0	0		1	0	0	0	0	0	0	0	0	0	0	0	0
55	0	55	1.2	1.2	10	1	0	1	0	0	0	0	0		0		0	0	0	1431	107	178.2	512	744	335	21	1	0	0	0	1	0	0	0	0		0	0	0	0	0	1	0	0	0	0	0	0	0
56	0	49	1	1	7	0	0	1	0	0	0	0	0		0		0	0	0	662	3	1.42	80	26	376	19	1	0	0	1	0	0	0	0	0		0	0	0	0	0	0	0	0	0	0	1	0	0
57	1	67	14	3	9	1	1	0	1	0	1	0	0		0		0	1	0	1232.1	2	54	112	118	368	470	1	0	0	0	1	0	0	0	0		0	0	0	1	0	0	0	0	0	0	0	0	0
58	1	65	3	1	9	0	0	0	0	0	0	0	0		0		0	0	0	304.2	7	42.7	106	119	215	69	1	0	0	0	0	0	1	0	1	Lung cancer	0	0	0	0	0	0	0	0	0	0	1	0	0
59	1	30	5	1	6	0	0	0	0	0	0	0	0		0		0	1	0	168.9	2	6	668	354	305	59	1	0	0	1	0	0	0	0	1	Lymphoma	0	0	0	0	0	0	0	0	0	1	0	0	0
60	0	67	2	1	9	0	0	1	0	0	1	0	0		0		0	0	0	401.1	13	7.9	97	114	755	2824	1	0	0	1	0	0	0	0	0		0	0	0	0	0	0	0	0	0	1	0	0	0
61	1	63	1	1	7	0	1	1	0	0	0	0	0		0		0	0	0	1407.7	45	5.74	25	30	302	293	1	0	0	0	1	0	0	0	0		1	0	0	0	0	0	0	0	0	0	0	0	0
[truncated: 49 more columns]
